# Supplementary material for: Nanostructured Lipid Carrier-Based Codelivery of Raloxifene and Naringin: Formulation, Optimization, In Vitro, Ex Vivo, In Vivo Assessment, and Acute Toxicity Studies
Source: MDPI journal article supplement (doi:10.3390/pharmaceutics14091771), 2022-08-25
Supplement: s1 [file s1]

### Supplementary Tables

**Supplementary Table S1.** Miscibility-based screening of solid lipid and liquid lipid ratios.

| S.NO. | Solid lipid | Liquid lipid | Interference        |
|-------|-------------|--------------|---------------------|
| 1     | 90          | 10           | No phase separation |
| 2     | 80          | 20           | No phase separation |
| 3     | 70          | 30           | No phase separation |
| 4     | 60          | 40           | No phase separation |
| 5     | 50          | 50           | Phase separation    |
| 6     | 40          | 60           | Phase separation    |
| 7     | 30          | 70           | Phase separation    |
| 8     | 20          | 80           | Phase separation    |
| 9     | 10          | 90           | Phase separation    |

**Supplementary Table S2.** Statistical ANOVA analysis for particle size response by quadratic model.

| Source                                                                              | Sum of Squares | df | Mean Square              | F-value | p-value  |                 |
|-------------------------------------------------------------------------------------|----------------|----|--------------------------|---------|----------|-----------------|
| Model                                                                               | 3983.35        | 9  | 442.59                   | 148.47  | < 0.0001 | significant     |
| A-Lipid                                                                             | 3254.06        | 1  | 3254.06                  | 1091.62 | < 0.0001 |                 |
| B-Surfactant                                                                        | 305.59         | 1  | 305.59                   | 102.51  | < 0.0001 |                 |
| C-Sonication time                                                                   | 19.27          | 1  | 19.27                    | 6.46    | 0.0293   |                 |
| AB                                                                                  | 88.44          | 1  | 88.44                    | 29.67   | 0.0003   |                 |
| AC                                                                                  | 14.47          | 1  | 14.47                    | 4.85    | 0.0521   |                 |
| BC                                                                                  | 19.47          | 1  | 19.47                    | 6.53    | 0.0286   |                 |
| A <sup>2</sup>                                                                      | 216.58         | 1  | 216.58                   | 72.66   | < 0.0001 |                 |
| B <sup>2</sup>                                                                      | 3.09           | 1  | 3.09                     | 1.04    | 0.3328   |                 |
| C <sup>2</sup>                                                                      | 70.98          | 1  | 70.98                    | 23.81   | 0.0006   |                 |
| Residual                                                                            | 29.81          | 10 | 2.98                     |         |          |                 |
| Lack of Fit                                                                         | 17.75          | 5  | 3.55                     | 1.47    | 0.3411   | not significant |
| Pure Error                                                                          | 12.06          | 5  | 2.41                     |         |          |                 |
| Cor Total                                                                           | 4013.16        | 19 |                          |         |          |                 |
| <b>Statistical fattiness analysis for particle size response by quadratic model</b> |                |    |                          |         |          |                 |
| Std. Dev.                                                                           | 1.73           |    | R <sup>2</sup>           |         |          | 0.9926          |
| Mean                                                                                | 143.16         |    | Adjusted R <sup>2</sup>  |         |          | 0.9859          |
| C.V. %                                                                              | 1.21           |    | Predicted R <sup>2</sup> |         |          | 0.9342          |
|                                                                                     |                |    | Adeq Precision           |         |          | 43.6130         |

**Supplementary Table S3.** Statistical ANOVA analysis for PDI response by quadratic model.

| Source            | Sum of Squares | df | Mean Square | F-value | p-value  |             |
|-------------------|----------------|----|-------------|---------|----------|-------------|
| Model             | 0.0104         | 9  | 0.0012      | 78.68   | < 0.0001 | significant |
| A-Lipid           | 0.0060         | 1  | 0.0060      | 409.02  | < 0.0001 |             |
| B-Surfactant      | 0.0020         | 1  | 0.0020      | 137.40  | < 0.0001 |             |
| C-Sonication time | 0.0012         | 1  | 0.0012      | 82.45   | < 0.0001 |             |
| AB                | 0.0000         | 1  | 0.0000      | 1.44    | 0.2579   |             |
| AC                | 0.0001         | 1  | 0.0001      | 7.16    | 0.0232   |             |
| BC                | 0.0001         | 1  | 0.0001      | 5.32    | 0.0437   |             |
| A <sup>2</sup>    | 0.0000         | 1  | 0.0000      | 2.18    | 0.1708   |             |
| B <sup>2</sup>    | 0.0003         | 1  | 0.0003      | 22.30   | 0.0008   |             |
| C <sup>2</sup>    | 0.0009         | 1  | 0.0009      | 61.33   | < 0.0001 |             |
| Residual          | 0.0001         | 10 | 0.0000      |         |          |             |
| Lack of Fit       | 0.0001         | 5  | 0.0000      | 23.46   | 0.0018   | significant |

|                                                                           |           |    |                          |  |         |  |
|---------------------------------------------------------------------------|-----------|----|--------------------------|--|---------|--|
| Pure Error                                                                | 6.000E-06 | 5  | 1.200E-06                |  |         |  |
| Cor Total                                                                 | 0.0105    | 19 |                          |  |         |  |
| <b>Statistical fattiness analysis for PDI response by quadratic model</b> |           |    |                          |  |         |  |
| Std. Dev.                                                                 | 0.0038    |    | R <sup>2</sup>           |  | 0.9861  |  |
| Mean                                                                      | 0.2639    |    | Adjusted R <sup>2</sup>  |  | 0.9735  |  |
| C.V. %                                                                    | 1.45      |    | Predicted R <sup>2</sup> |  | 0.8204  |  |
|                                                                           |           |    | Adeq Precision           |  | 36.6952 |  |

**Supplementary Table S4.** Statistical ANOVA analysis for EE % RLX response by quadratic model.

| Source                                                                         | Sum of Squares | df | Mean Square              | F-value | p-value  |                 |
|--------------------------------------------------------------------------------|----------------|----|--------------------------|---------|----------|-----------------|
| Model                                                                          | 250.78         | 9  | 27.86                    | 96.00   | < 0.0001 | significant     |
| A-Lipid                                                                        | 82.83          | 1  | 82.83                    | 285.37  | < 0.0001 |                 |
| B-Surfactant                                                                   | 3.12           | 1  | 3.12                     | 10.77   | 0.0083   |                 |
| C-Sonication time                                                              | 22.26          | 1  | 22.26                    | 76.69   | < 0.0001 |                 |
| AB                                                                             | 64.30          | 1  | 64.30                    | 221.53  | < 0.0001 |                 |
| AC                                                                             | 8.99           | 1  | 8.99                     | 30.97   | 0.0002   |                 |
| BC                                                                             | 4.93           | 1  | 4.93                     | 16.98   | 0.0021   |                 |
| A <sup>2</sup>                                                                 | 7.09           | 1  | 7.09                     | 24.43   | 0.0006   |                 |
| B <sup>2</sup>                                                                 | 5.55           | 1  | 5.55                     | 19.13   | 0.0014   |                 |
| C <sup>2</sup>                                                                 | 3.67           | 1  | 3.67                     | 12.66   | 0.0052   |                 |
| Residual                                                                       | 2.90           | 10 | 0.2903                   |         |          |                 |
| Lack of Fit                                                                    | 2.09           | 5  | 0.4189                   | 2.59    | 0.1597   | not significant |
| Pure Error                                                                     | 0.8082         | 5  | 0.1616                   |         |          |                 |
| Cor Total                                                                      | 0.0105         | 19 |                          |         |          |                 |
| <b>Statistical fattiness analysis for RLX % EE response by quadratic model</b> |                |    |                          |         |          |                 |
| Std. Dev.                                                                      | 0.5387         |    | R <sup>2</sup>           |         | 0.9886   |                 |
| Mean                                                                           | 88.34          |    | Adjusted R <sup>2</sup>  |         | 0.9783   |                 |
| C.V. %                                                                         | 0.6098         |    | Predicted R <sup>2</sup> |         | 0.8410   |                 |
|                                                                                |                |    | Adeq Precision           |         | 41.9474  |                 |

**Supplementary Table S5.** Statistical ANOVA analysis for EE% NRG response by quadratic model.

| Source                                                                         | Sum of Squares | df | Mean Square              | F-value | p-value  |                 |
|--------------------------------------------------------------------------------|----------------|----|--------------------------|---------|----------|-----------------|
| Model                                                                          | 283.97         | 9  | 31.55                    | 42.85   | < 0.0001 | significant     |
| A-Lipid                                                                        | 129.46         | 1  | 129.46                   | 175.82  | < 0.0001 |                 |
| B-Surfactant                                                                   | 15.80          | 1  | 15.80                    | 21.46   | 0.0009   |                 |
| C-Sonication time                                                              | 15.70          | 1  | 15.70                    | 21.32   | 0.0010   |                 |
| AB                                                                             | 47.58          | 1  | 47.58                    | 64.62   | < 0.0001 |                 |
| AC                                                                             | 1.00           | 1  | 1.00                     | 1.36    | 0.2707   |                 |
| BC                                                                             | 12.83          | 1  | 12.83                    | 17.42   | 0.0019   |                 |
| A <sup>2</sup>                                                                 | 14.36          | 1  | 14.36                    | 19.50   | 0.0013   |                 |
| B <sup>2</sup>                                                                 | 6.44           | 1  | 6.44                     | 8.74    | 0.0144   |                 |
| C <sup>2</sup>                                                                 | 0.0396         | 1  | 0.0396                   | 0.0538  | 0.8213   |                 |
| Residual                                                                       | 7.36           | 10 | 0.7363                   |         |          |                 |
| Lack of Fit                                                                    | 5.19           | 5  | 1.04                     | 2.40    | 0.1798   | not significant |
| Pure Error                                                                     | 2.17           | 5  | 0.4336                   |         |          |                 |
| Cor Total                                                                      | 291.33         | 19 |                          |         |          |                 |
| <b>Statistical fattiness analysis for NRG % EE response by quadratic model</b> |                |    |                          |         |          |                 |
| Std. Dev.                                                                      | 0.8581         |    | R <sup>2</sup>           |         | 0.9747   |                 |
| Mean                                                                           | 81.95          |    | Adjusted R <sup>2</sup>  |         | 0.9520   |                 |
| C.V. %                                                                         | 1.05           |    | Predicted R <sup>2</sup> |         | 0.7665   |                 |
|                                                                                |                |    | Adeq Precision           |         | 28.2023  |                 |

**Supplementary Table S6.** Kinetics of release of RLX and NRG from RLX/NRG-NLCs.

| Drug loaded NLCs | Zero order ( $R^2$ ) | First order ( $R^2$ ) | Hixon ( $R^2$ ) | Higuchi ( $R^2$ ) | Peppas    |        | Higuchi ( $R^2$ ) | Best fit    |
|------------------|----------------------|-----------------------|-----------------|-------------------|-----------|--------|-------------------|-------------|
|                  |                      |                       |                 |                   | ( $R^2$ ) | n      |                   |             |
| RAL              | 0.6273               | 0.8708                | 0.7511          | 0.8519            | 0.3748    | 0.5822 | 0.8519            | First order |
| NAR              | 0.6105               | 0.8602                | 0.7767          | 0.8327            | 0.4719    | 0.6938 | 0.8327            | First order |

## Supplementary figures

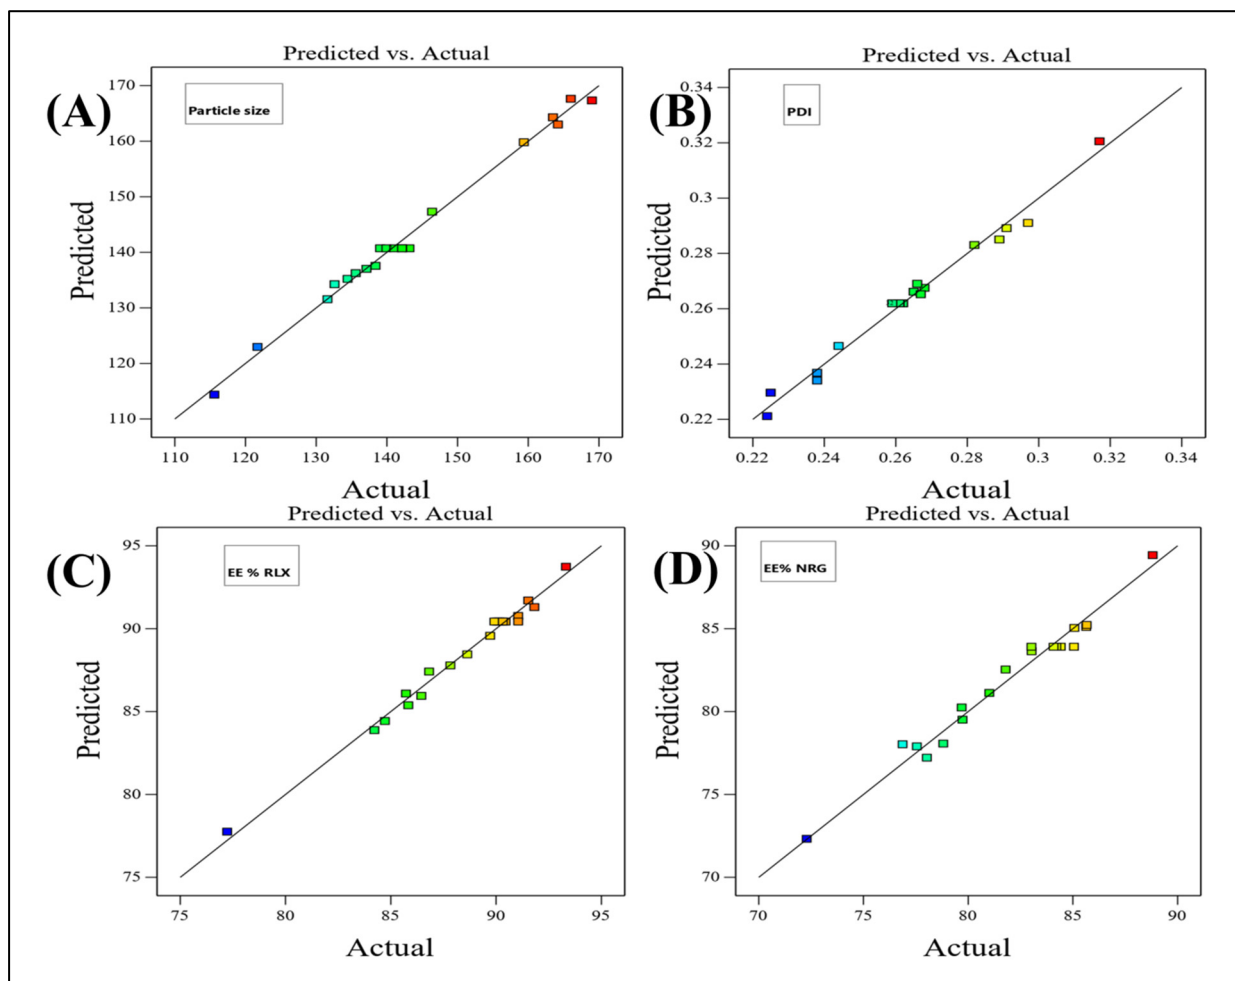

**Supplementary Figure S1:** Predicted vs actual values linear correlation plots for (A) Particle size, (B) PDI and (C,D) % Entrapment Efficiency of RLX/NRG-NLCs.

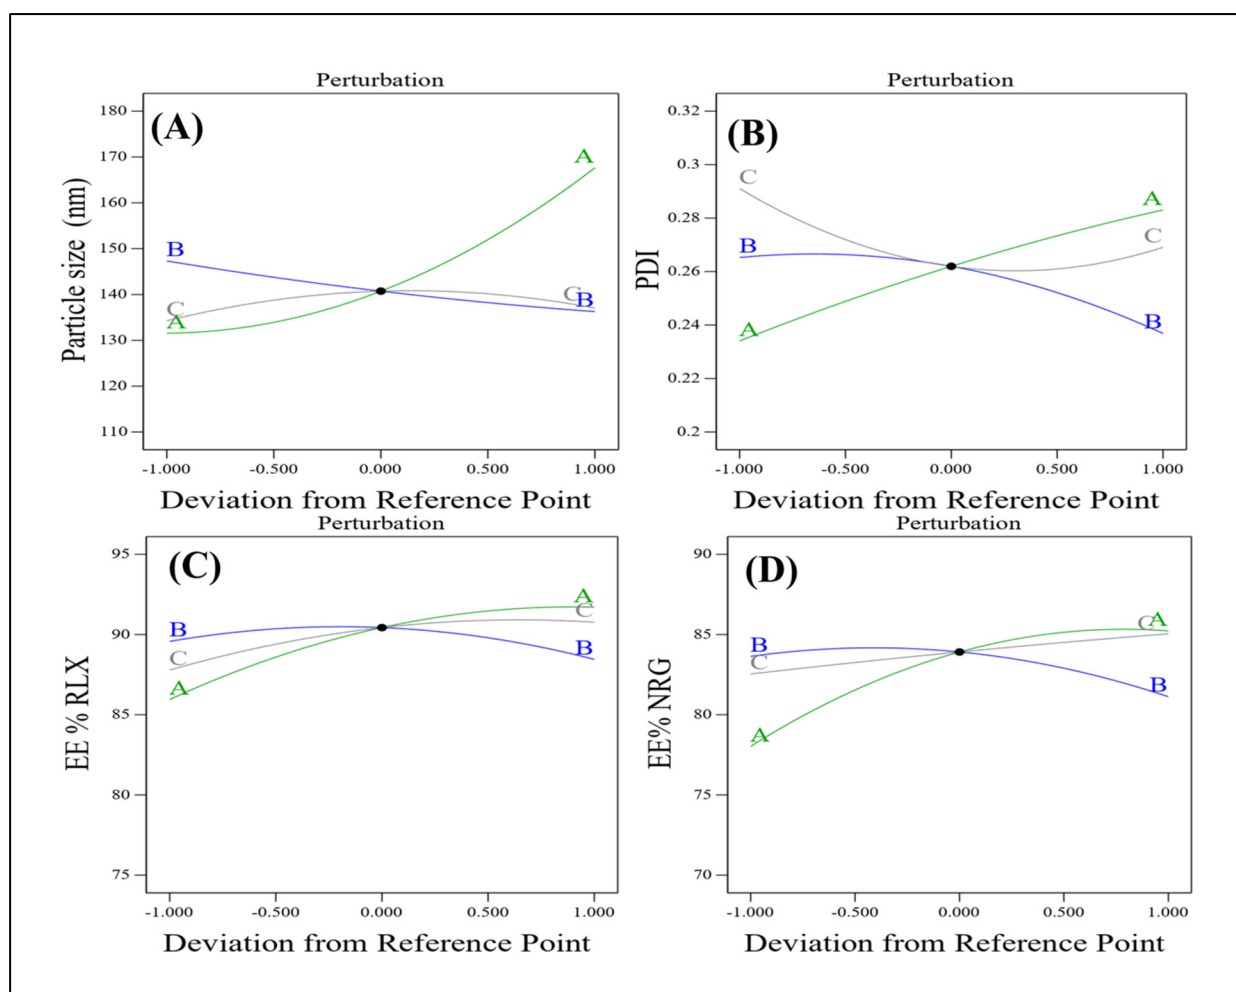

**Supplementary Figure S2:** Perturbation correlation plots for (A) Particle size, (B) PDI and (C,D) % Entrapment Efficiency of RLX/NRG-NLCs.

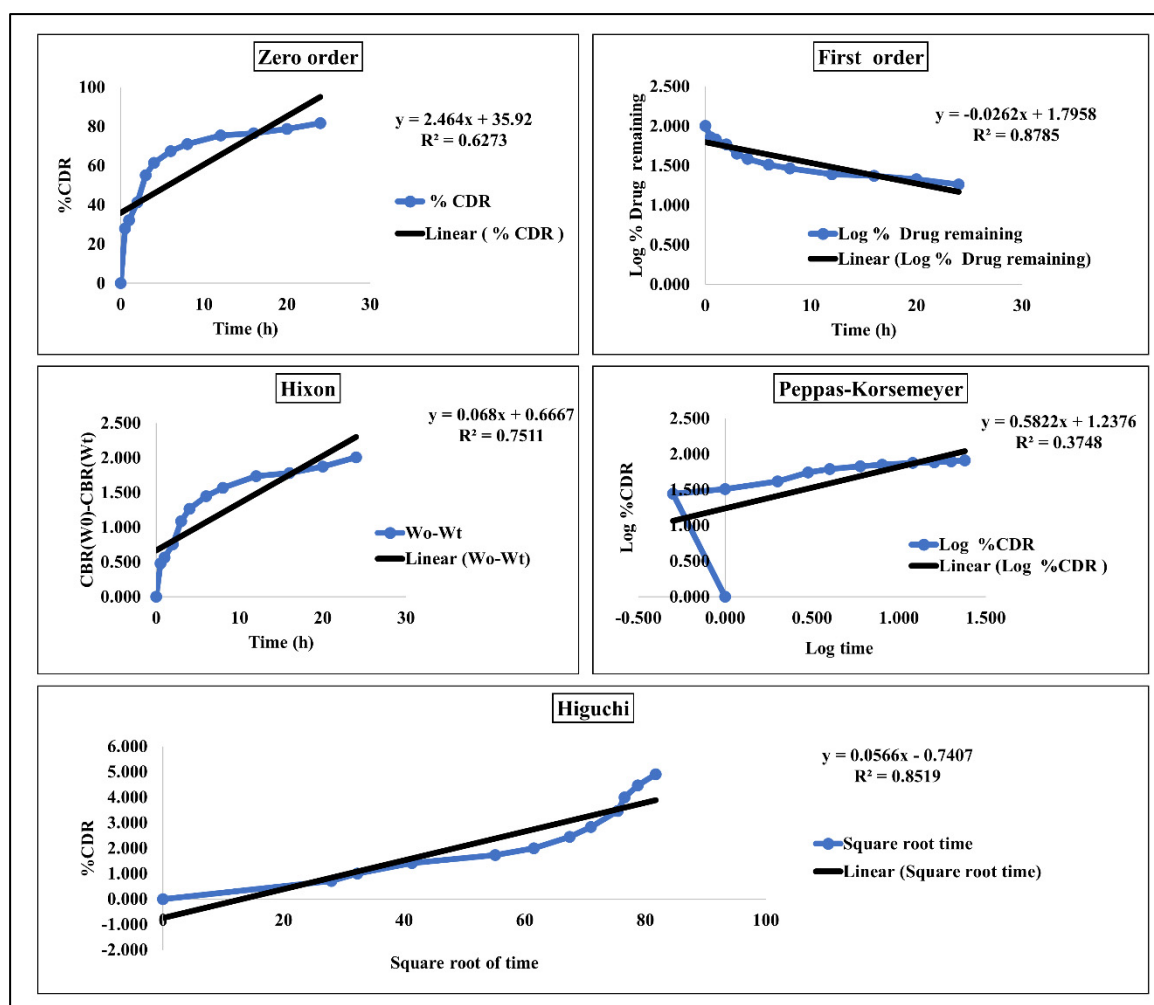

Supplementary Figure S3. Release kinetic study for RLX in the RLX/NRG-NLCs.

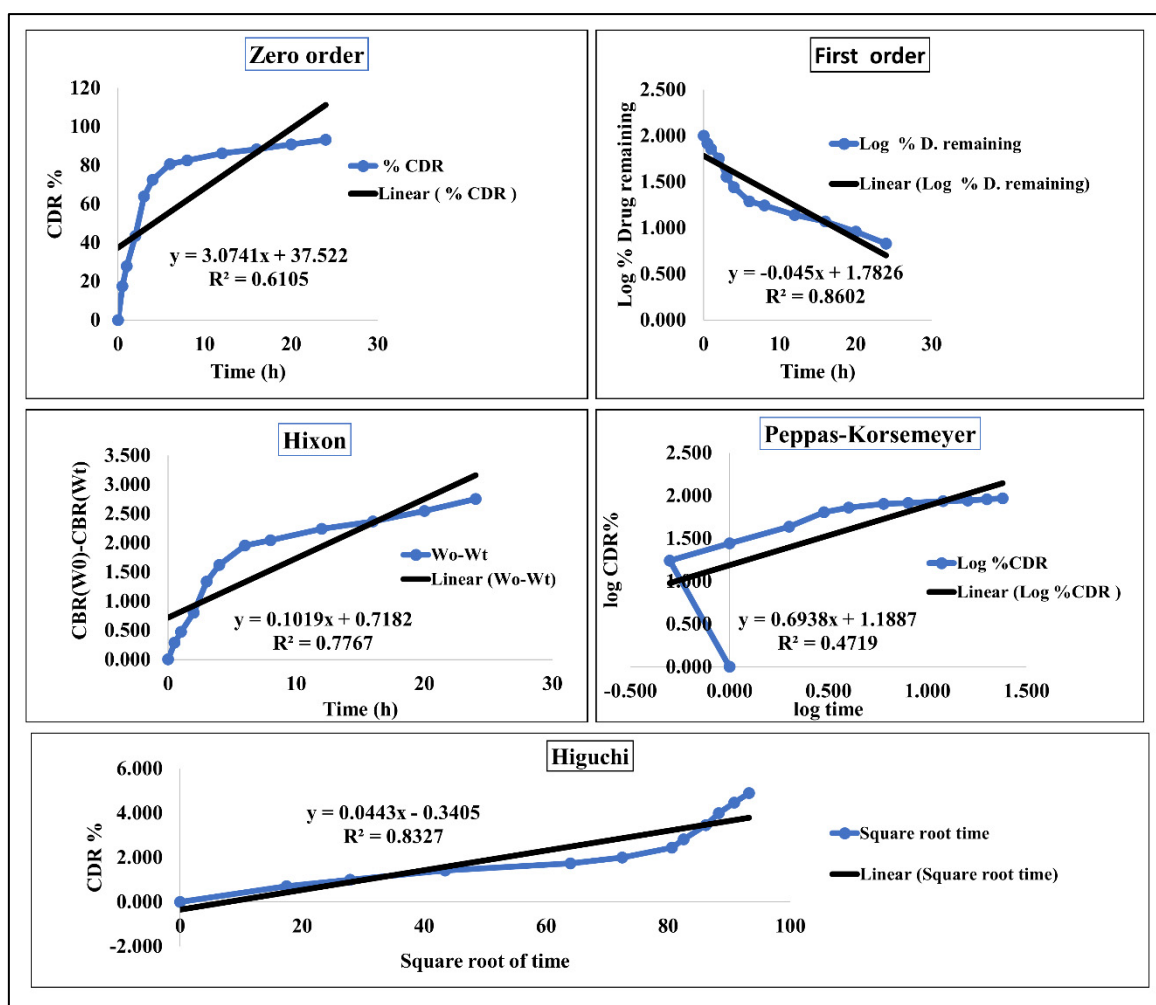

Supplementary Figure S4. Release kinetic study of NRG in RLX/NRG-NLCs.
